# Supplementary material for: A major midlatitude hurricane in the Little Ice Age
Source: Copernicus journal article supplement (doi:10.5194/egusphere-2023-902), 2023-05-23
Supplement: Supplementary file 1 [file egusphere-2023-902-supplement-version1.pdf]

Table S1 Comparative Fleet Strength

| Ship                                      | Guns | Crew |
|-------------------------------------------|------|------|
| <b>France</b>                             |      |      |
| <b>Joseph-Francois de Noble du Revest</b> |      |      |
| L'Hector                                  | 74   | 600  |
| L'Achille                                 | 64   | 400  |
| Le Vaillant                               | 64   | 400  |
| Le Sage                                   | 64   | 400  |
| <b>Joseph Chevalier de Beaufremont</b>    |      |      |
| Le Tonnant                                | 80   | 620  |
| Le Defenseur                              | 74   | 620  |
| Le Diademe                                | 74   | 600  |
| L'Inflexible                              | 64   | 400  |
| L'Eveille                                 | 64   | 400  |
| <b>Vice Admiral Dubois de la Motte</b>    |      |      |
| Duc de Bourgogne                          | 80   | 620  |
| Le Formidable                             | 74   | 620  |
| Le Superbe                                | 74   | 520  |
| Le Heros                                  | 74   | 600  |
| Le Glorieux                               | 74   | 600  |
| Le Dauphin-Royal                          | 70   | 520  |
| Le Belliqueux                             | 64   | 400  |
| Le Celebre                                | 64   | 400  |
| Le Bizarre                                | 64   | 400  |
| L'Abenaquise                              | 38   | 320  |
| La Comette                                | 30   | 240  |
| La Fortune                                | 30   | 240  |
| La Brune                                  | 30   | 240  |
| Le Fleur de Lys                           | 28   | 240  |
| L'Hermione                                | 26   | 220  |
| Total crew (nominal): 10 620              |      |      |

| Ship                                  | Guns           | Crew |
|---------------------------------------|----------------|------|
| <b>Britain</b>                        |                |      |
| <b>Rear Admiral Sir Charles Hardy</b> |                |      |
| HMS Invincible                        | 74             | 700  |
| HMS Captain                           | 64             | 400  |
| HMS Nassau                            | 64             | 400  |
| HMS Windsor                           | 60             | 420  |
| HMS Kingston                          | 60             | 400  |
| HMS Tilbury                           | 58             | 400  |
| <b>Commodore Charles Holmes</b>       |                |      |
| HMS Terrible                          | 74             | 600  |
| HMS Grafton                           | 60             | 535  |
| HMS Eagle                             | 60             | 420  |
| HMS Somerset                          | 60             | 520  |
| HMS Centurion                         | 52             | 350  |
| <b>Vice Admiral Frances Holbourne</b> |                |      |
| HMS Newark                            | 80             | 620  |
| HMS Northumberland                    | 70             | 520  |
| HMS Prince Frederick                  | 70             | 520  |
| HMS Devonshire                        | 70             | 500  |
| HMS Bedford                           | 64             | 400  |
| HMS Defiance                          | 60             | 420  |
| HMS Orford                            | 60             | 520  |
| HMS Sunderland                        | 60             | 400  |
| HMS Lightning                         | fireship       | 55   |
| HMS Gibraltar's Prize                 | sloop          | 80   |
| HMS Nightingale                       | fire ship      | 55   |
| HMS Furnace                           | 14-gun bomb    | 100  |
| HMS Granada                           | 14-gun bomb    | 100  |
| HMS Ferret                            | 14-gun sloop   | 125  |
| HMS Port Mahon                        | 24-gun frigate | 220  |
| HMS Hawk                              | 10-gun sloop   | 90   |
| HMS Hunter                            | 10-gun sloop   | 90   |
| HMS Cruiser                           | 8-gun sloop    | 80   |
| Total Crew (nominal): 10 040          |                |      |

Table S2 Ships of the Line (Specifications)

| Comparison of Two Ships of the Line (Third Rates) |                       |                            |                      |                            |
|---------------------------------------------------|-----------------------|----------------------------|----------------------|----------------------------|
| Ship Name                                         | Invincible            |                            | Le Tonnant           |                            |
| Nominal Guns                                      | 74                    |                            | 80                   |                            |
| Rig                                               | Ship                  |                            | Ship                 |                            |
| Navy                                              | Royal Navy            |                            | Marine Royale        |                            |
| Nationality                                       | Great Britain         |                            | France               |                            |
| Length of Gundeck                                 | 171' 3" (52.12 m)     |                            | 179' 0" (54.56 m)    |                            |
| Length of Keel                                    | 139' 0.5" (42.38 m)   |                            | 164' 1" (49.99 m)    |                            |
| Breadth                                           | 49' 3" (14.94 m)      |                            | 49' 0" (14.94 m)     |                            |
| Depth in Hold                                     | 21' 3" (6.48 m)       |                            | 24' 6" (7.47 m)      |                            |
| Armament                                          | Naval Artillery (GBR) | Individual Gun Weight (kg) | Naval Artillery FR   | Individual Gun Weight (kg) |
| Lower Gun Deck                                    | 28 x 32-pounder guns  | 2845                       | 30 x 36-pounder guns | 3250                       |
| Upper Gun Deck                                    | 30 x 18-pounder guns  | 1360                       | 32 x 18-pounder guns | 2060                       |
| Quarterdeck                                       | 10 x 9-pounder guns   | 1448                       | 10 x 6-pounder guns  | 1445                       |
| Forecastle                                        | 6 x 9-pounder guns    | 1448                       | 8 x 6-pounder guns   | 1445                       |

Ships of the Line at Louisbourg in 1757 *HMS Invincible* and *le Tonnant*. Ships of the line were designed to sail in line past each other in opposite directions while firing heavy artillery at close range. Guns were named for the weight of round shot (cannonballs) which, with a velocity of 487 m/s (1598 ft/s) could penetrate the two feet of solid oak of the enemy ship, tear apart enemy guns and carriages weighing 4 tons, and punch a hole through the other side. Broadships (all guns on one side of a ship fired simultaneously) were measured by weight of iron shot. *Invincible's* weight of broadside was 399 kg compared to *Le Tonnant's* 432 kg. Ships also carried antipersonnel grape or cannister shot that exploded into a shower of iron balls and steel shards and bar or chain shot which spun to destroy masts, spars, sails and rigging. [British Third Rate ship of the line 'Invincible' \(1747\) \(threedecks.org\)](#) and [French Third Rate ship of the line 'Le Tonnant' \(1743\) \(threedecks.org\)](#)

Figure S1 Captain's Log HMS Sunderland (excerpt)

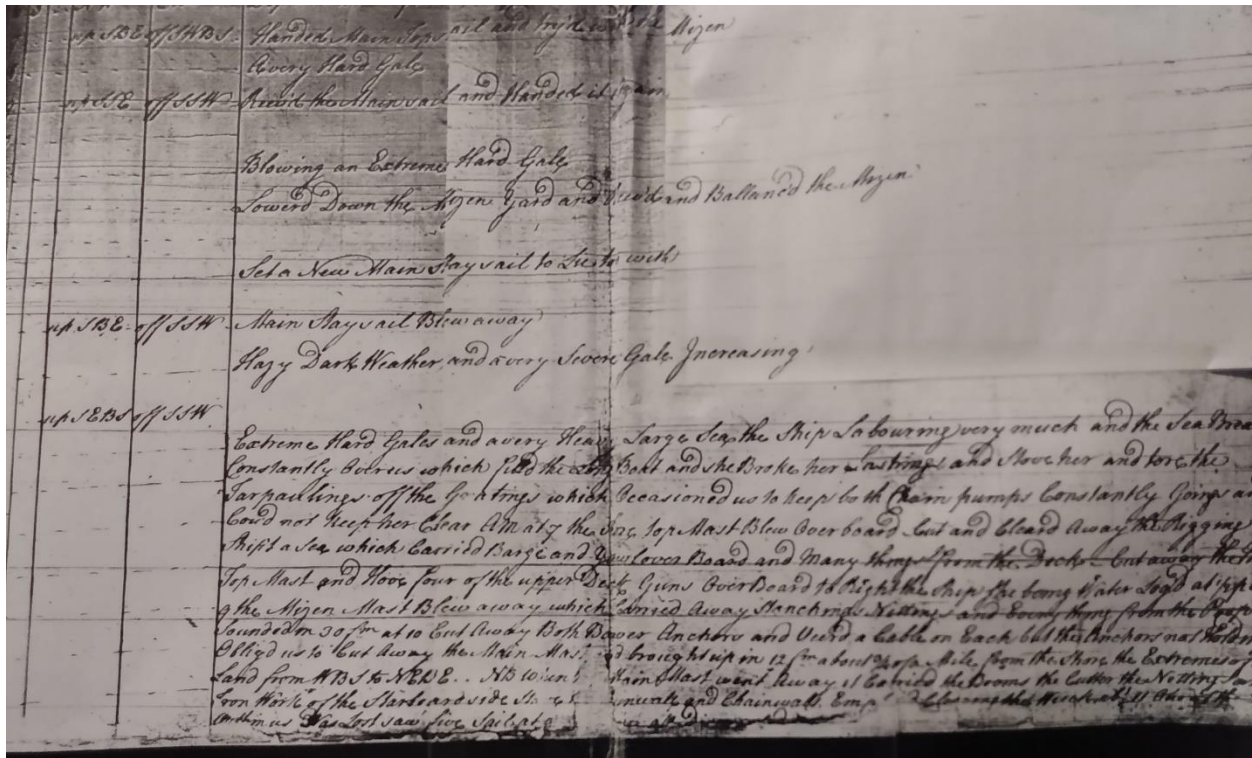

**Transposed Excerpt from the Captain's Log of HMS Sunderland for Sunday, September 25, 1757 (above; 6 a.m. to noon, sea day September 25 noting timing of specific storm details)**

ADM 51/921 Captain's Log HMS Sunderland (1756 Nov 15–1759 Feb 23), The National Archives, UK, 1757.

Many Royal Navy logbooks at the National Archives (UK) are not in digital format, requiring staff to locate the requested logbook, with entries potentially covering several years and hundreds of pages. After searching for the pertinent pages digital or paper copies may be requested for analysis by researchers. This requires an understanding of historical terminology and the ability to transpose cursive records written at sea with a quill and ink.

Bearing: SEBS

Winds: SSW

Extreme hard gales and a very heavy large sea the ship labouring very much and the sea breaking constantly over us which filled the long boat and she broke her lashings and stove her and tore the tarpaulings [tarpaulins] off the grating which occasioned us to keep the chain pumps continually going and could not keep her clear. A.M. at 7 the fore topmast blew overboard cut and cleared away the rigging. Ship'd a sea which carried barge and yawl overboard and many things from the deck. Cut away the maintopmast and hove four of the upper deck guns overboard

to right the ship she becoming waterlogged. At  $\frac{1}{2}$  past 9 the mizen (mizzen) blew away which carried away stanchions, netting and everything from the poop [deck] Sounded on 30 fm [fathoms] at 10. Cut away both bower anchors [starboard and port side bow anchors] and veered a cable on each. Cut the anchors not holding obliged us to cut away the main mast and brought up in 12 fm about  $\frac{3}{4}$  of a mile from the shore the extremes of the land from WBS to NEBE..NB when the main mast went away it carried the booms the cutter the netting and iron work of the starboard side ... [missing section] ... chainwalls [chain wales]. Employed clearing the wreck at 11 one of the ships within us was lost saw five sail at anchor all dismasted
